# Supplementary material for: Exopolysaccharide protects Vibrio cholerae from exogenous attacks by the type 6 secretion system
Source: PubMed Central journal article supplement — Proc Natl Acad Sci U S A. 2018 Jul 18;115(31):7997–8002. doi: 10.1073/pnas.1808469115 (PMC6077691; doi:10.1073/pnas.1808469115), 2018-07-18
Supplement: pnas.1808469115.sapp.pdf [file pnas.1808469115.sapp.pdf]

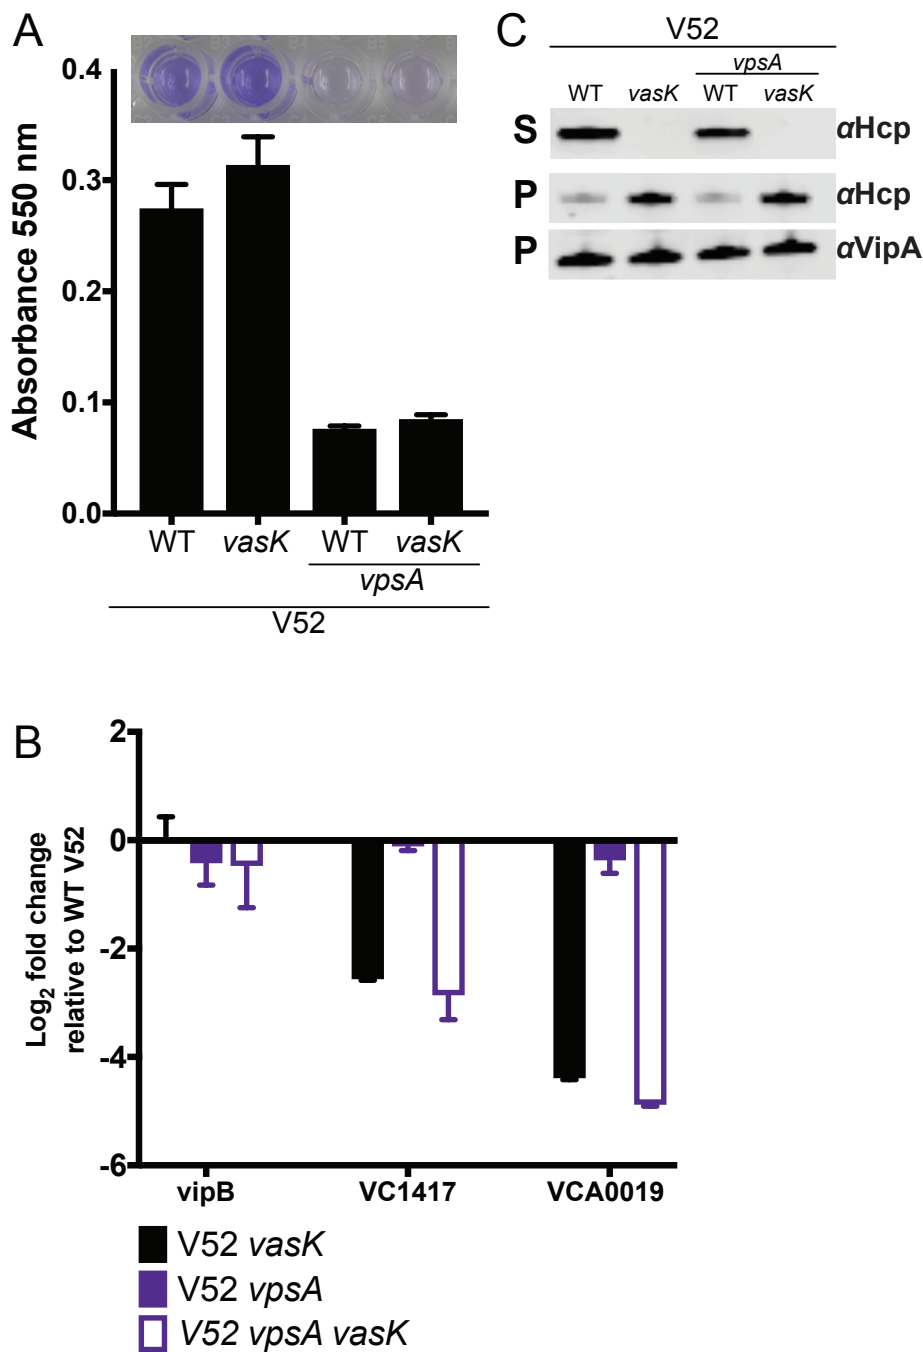

Figure S1. Deletion of *vpsA* from *V. cholerae* impairs biofilm formation independent of T6SS functionality. Data A-B represent the mean  $\pm$  standard deviation of two biological replicates. (A) Crystal violet staining of *vpsA* mutants in wild type V52 and V52 *vasK* (T6SS<sup>-</sup>). (B) Expression of indicated genes in *vpsA* mutant backgrounds were measured by qRT-PCR with respect to wild type V52. (C) Supernatant (S) and cell pellets (P) were collected for wild type and *vpsA* mutants in the presence and absence of a functional T6SS and analyzed by western blot using anti-Hcp antibody. Blot with anti-vipA is a loading control.

Table S1. Strains used in this study

| Organism           | Genotype                                                         | Plasmid     | Relevant Characteristics                                                                                     | Reference  |
|--------------------|------------------------------------------------------------------|-------------|--------------------------------------------------------------------------------------------------------------|------------|
| <i>V. cholerae</i> |                                                                  |             |                                                                                                              |            |
| 2740-80            | ClpV-mCherry2                                                    |             | Parental strain, lacZ <sup>-</sup> , Str <sup>r</sup>                                                        | (1)        |
|                    | lacZ <sup>-</sup> , Str <sup>r</sup> , ΔvipA ClpV-mCherry2       |             | <i>vipA</i> (VCA0107) in frame deletion, lacZ <sup>-</sup> , Str <sup>r</sup>                                | (1)        |
|                    | lacZ <sup>-</sup> , Str <sup>r</sup> , ΔvpsA ClpV-mCherry2       |             | <i>vpsA</i> (VC1917) in frame deletion, lacZ <sup>-</sup> , Str <sup>r</sup>                                 | this study |
|                    | lacZ <sup>-</sup> , Str <sup>r</sup> , ΔvpsA ΔvipA ClpV-mCherry2 |             | <i>vpsA</i> (VC1917) in frame deletion in <i>vipA</i> background, lacZ <sup>-</sup> , Str <sup>r</sup>       | this study |
|                    | lacZ <sup>-</sup> , Str <sup>r</sup> , ΔflaA ClpV-mCherry2       |             | <i>flaA</i> (VC2188) in frame deletion, lacZ <sup>-</sup> , Str <sup>r</sup>                                 | this study |
|                    | lacZ <sup>-</sup> , Str <sup>r</sup> , ΔmotX ClpV-mCherry2       |             | <i>motX</i> (VC2601) in frame deletion, lacZ <sup>-</sup> , Str <sup>r</sup>                                 | this study |
|                    | lacZ <sup>-</sup> , Str <sup>r</sup> , ΔflaA ΔvpsA ClpV-mCherry2 |             | <i>vpsA</i> (VC1917) in frame deletion in <i>flaA</i> background, lacZ <sup>-</sup> , Str <sup>r</sup>       | this study |
| V52                | Δrhh                                                             |             | <i>rtxA hlyA hapA</i> parental strain, Str <sup>r</sup>                                                      | (2)        |
|                    | Δrhh ΔvasK                                                       |             | <i>vasK</i> (VCA0120) in frame deletion, Str <sup>r</sup>                                                    | (2)        |
|                    | Δrhh ΔvpsA                                                       |             | <i>vpsA</i> (VC1917) in frame deletion, Str <sup>r</sup>                                                     | this study |
|                    | Δrhh ΔvpsA ΔvasK                                                 |             | <i>vpsA</i> in frame deletion in <i>vasK</i> background, Str <sup>r</sup>                                    | this study |
|                    | Δrhh ΔflaA                                                       |             | <i>flaA</i> (VC2188) in frame deletion, Str <sup>r</sup>                                                     | this study |
|                    | Δrhh ΔmotX                                                       |             | <i>motX</i> (VC2601) in frame deletion, Str <sup>r</sup>                                                     | this study |
|                    | Δrhh                                                             | pBAD33      | parental strain with empty pBAD33 plasmid, Str <sup>r</sup> , Cm <sup>r</sup>                                | this study |
|                    | Δrhh ΔvpsA                                                       | pBAD33      | <i>vpsA</i> deletion in parental strain with empty pBAD33 plasmid, Str <sup>r</sup> , Cm <sup>r</sup>        | this study |
|                    | Δrhh ΔVgrG-3ΔVCA0124                                             |             | <i>VgrG3-VCA0124</i> in frame deletion, Str <sup>r</sup>                                                     | (2)        |
|                    | Δrhh ΔVC1417-VC1421                                              |             | <i>VC1417-VC1421</i> in frame deletion, Str <sup>r</sup>                                                     | (2)        |
|                    | Δrhh ΔVCA0019-VCA0021                                            |             | <i>VCA0019-VCA0021</i> in frame deletion, Str <sup>r</sup>                                                   | (2)        |
|                    | Δrhh ΔVgrG-3ΔVCA0124 ΔvpsA                                       |             | <i>vpsA</i> in frame deletion in <i>VgrG3-VCA0124</i> background, Str <sup>r</sup>                           | this study |
|                    | Δrhh ΔVC1417-VC1421 ΔvpsA                                        |             | <i>vpsA</i> in frame deletion in <i>VC1417-VC1421</i> background, Str <sup>r</sup>                           | this study |
|                    | Δrhh ΔVCA0019-VCA0021 ΔvpsA                                      |             | <i>vpsA</i> in frame deletion in <i>VCA0019-VCA0021</i> background, Str <sup>r</sup>                         | this study |
|                    | Δrhh ΔVgrG-3ΔVCA0124                                             | pCR-XL-TOPO | <i>VgrG3-VCA0124</i> in frame deletion with empty pCR-XL-TOPO plasmid, Str <sup>r</sup> , Kan <sup>r</sup>   | this study |
|                    | Δrhh ΔVC1417-VC1421                                              | pCR-XL-TOPO | <i>VC1417-VC1421</i> in frame deletion with empty pCR-XL-TOPO plasmid, Str <sup>r</sup> , Kan <sup>r</sup>   | this study |
|                    | Δrhh ΔVCA0019-VCA0021                                            | pCR-XL-TOPO | <i>VCA0019-VCA0021</i> in frame deletion with empty pCR-XL-TOPO plasmid, Str <sup>r</sup> , Kan <sup>r</sup> | this study |

|                      |                                                            |             |                                                                                                                               |            |
|----------------------|------------------------------------------------------------|-------------|-------------------------------------------------------------------------------------------------------------------------------|------------|
|                      | $\Delta$ rh $\Delta$ VgrG-3 $\Delta$ VCA0124 $\Delta$ vpsA | pCR-XL-TOPO | <i>vpsA</i> deletion in <i>VgrG3-VCA0124</i> background with empty pCR-XL-TOPO plasmid, Str <sup>r</sup> , Kan <sup>r</sup>   | this study |
|                      | $\Delta$ rh $\Delta$ VC1417-VC1421 $\Delta$ vpsA           | pCR-XL-TOPO | <i>vpsA</i> deletion in <i>VC1417-VC1421</i> background with empty pCR-XL-TOPO plasmid, Str <sup>r</sup> , Kan <sup>r</sup>   | this study |
|                      | $\Delta$ rh $\Delta$ VCA0019-VCA0021 $\Delta$ vpsA         | pCR-XL-TOPO | <i>vpsA</i> deletion in <i>VCA0019-VCA0021</i> background with empty pCR-XL-TOPO plasmid, Str <sup>r</sup> , Kan <sup>r</sup> | this study |
|                      | $\Delta$ rh $\Delta$ rbmA                                  |             | <i>rbmA</i> (VC0928) in frame deletion, Str <sup>r</sup>                                                                      | this study |
|                      | $\Delta$ rh $\Delta$ rbmC                                  |             | <i>rbmC</i> (VC0930) in frame deletion, Str <sup>r</sup>                                                                      | this study |
|                      | $\Delta$ rh $\Delta$ bap1                                  |             | <i>rbmA</i> (VC1888) in frame deletion, Str <sup>r</sup>                                                                      | this study |
|                      | $\Delta$ vgrG3                                             | pNucSe1     | <i>vgrG3</i> in frame deletion with NucSe1 expressed on pBAD33                                                                | (3)        |
|                      | $\Delta$ vgrG3 $\Delta$ vipA                               | pNucSe1     | <i>vgrG3 vipA</i> in frame deletion with NucSe1 expressed on pBAD33                                                           | (3)        |
| <i>E. coli</i>       | MG1655                                                     |             | Gm <sup>r</sup>                                                                                                               | (1)        |
| <i>A. baylyi</i>     | ADP1                                                       |             | ATCC 33305 parental strain                                                                                                    | (4)        |
|                      | ADP1 $\Delta$ T6SS                                         |             | T6SS deletion, Kan <sup>r</sup>                                                                                               | (4)        |
| <i>P. aeruginosa</i> | PA01 $\Delta$ retS ClpV-GFP                                |             | parental strain, Irg <sup>r</sup>                                                                                             | (1)        |

Table S2. Plasmids used in this study

| <b>Plasmid</b>        | <b>Relevant Characteristics</b>                                                 | <b>Source</b> |
|-----------------------|---------------------------------------------------------------------------------|---------------|
| pDS132                | suicide vector used for allelic exchange, <i>sacB</i> , Cm <sup>r</sup>         | (5)           |
| pWM91                 | suicide vector used for allelic exchange, <i>sacB</i> , Carb <sup>r</sup>       | (6)           |
| pCR-XL-TOPO           | TOPO cloning vector, used to make strains kanamycin resistant, Kan <sup>r</sup> | Invitrogen    |
| pBAD33                | expression vector, Cm <sup>r</sup>                                              | (1)           |
| pWM91- $\Delta$ vpsA  | <i>vpsA</i> suicide vector, Carb <sup>r</sup>                                   | this study    |
| pDS132- $\Delta$ flaA | <i>flaA</i> suicide vector, Cm <sup>r</sup>                                     | this study    |
| pDS132- $\Delta$ motX | <i>motX</i> suicide vector, Cm <sup>r</sup>                                     | this study    |

## References

1. Basler M, Ho BT, & Mekalanos JJ (2013) Tit-for-Tat: Type VI Secretion System Counterattack during Bacterial Cell-Cell Interactions. *Cell* 152(4):884-894.
2. Zheng J, Ho B, & Mekalanos JJ (2011) Genetic analysis of anti-amoebae and anti-bacterial activities of the type VI secretion system in *Vibrio cholerae*. *PLoS One* 6(8):e23876.
3. Ho BT, Fu Y, Dong TG, & Mekalanos JJ (2017) *Vibrio cholerae* type 6 secretion system effector trafficking in target bacterial cells. *Proc Natl Acad Sci U S A* 114(35):9427-9432.
4. Shneider MM, *et al.* (2013) PAAR-repeat proteins sharpen and diversify the type VI secretion system spike. *Nature* 500(7462):350-353.
